# Supplementary figures and images for: Finding Aquaporins in Annelids: An Evolutionary Analysis and a Case Study
Source: MDPI journal article supplement (doi:10.3390/cells10123562), 2021-12-17

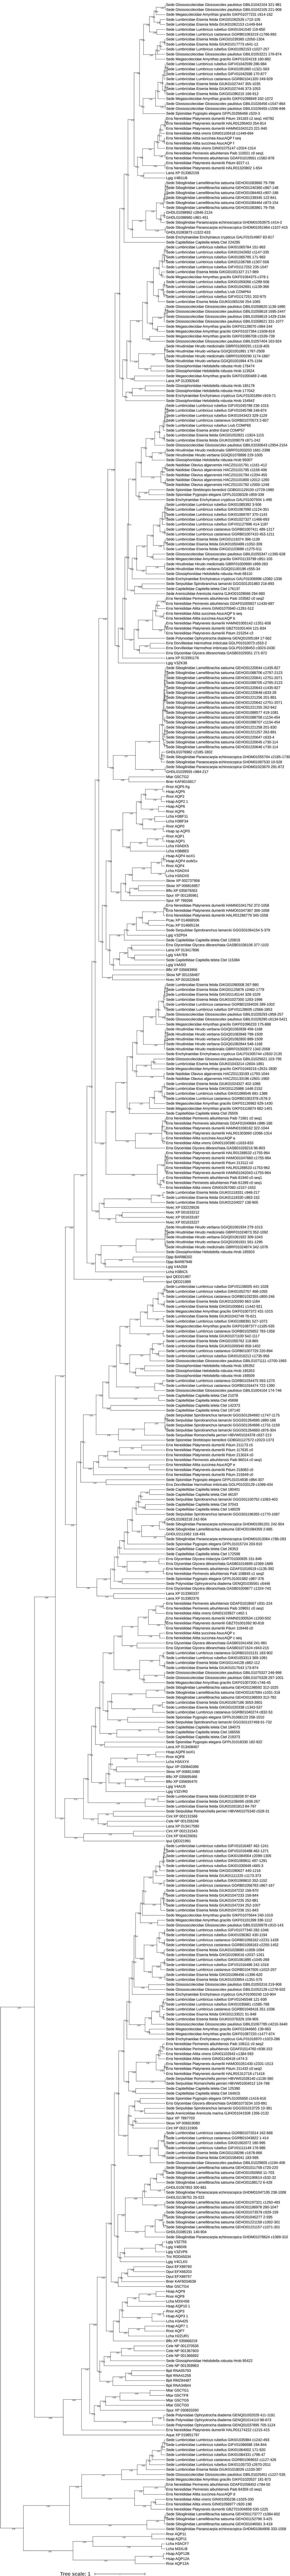

Supplement: s1 [file s1]

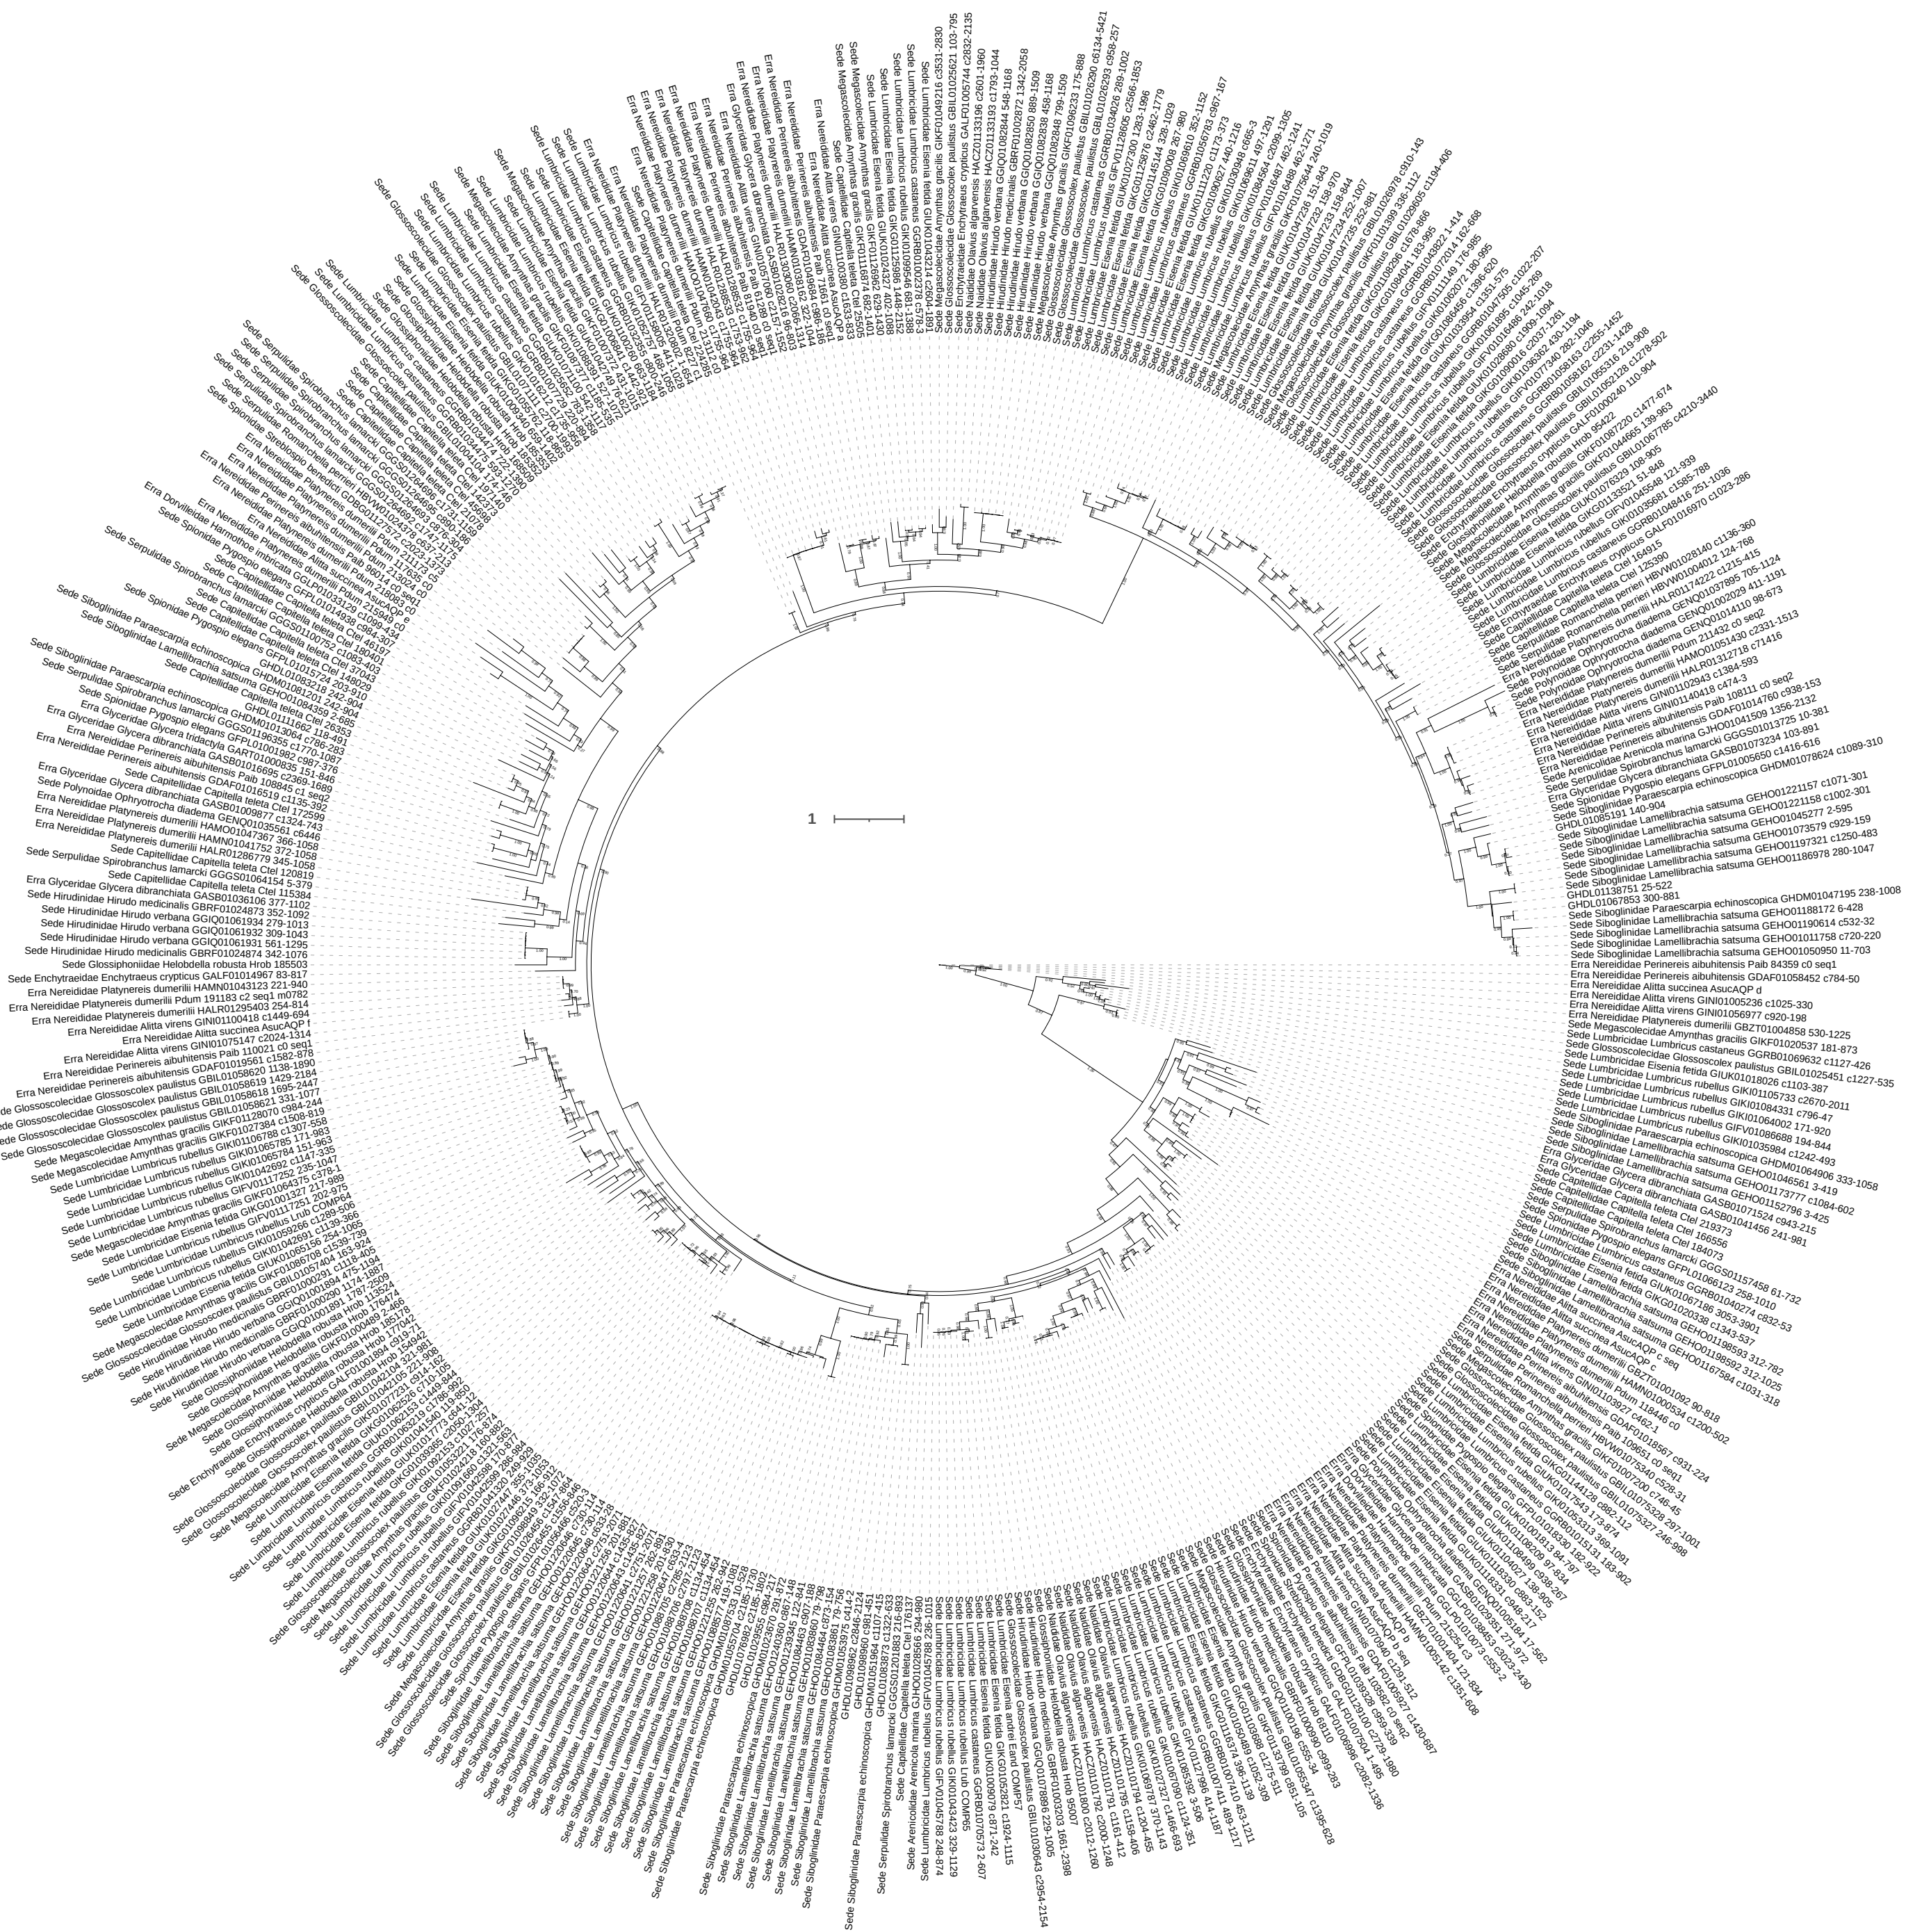

Supplement: s1 [file s1]

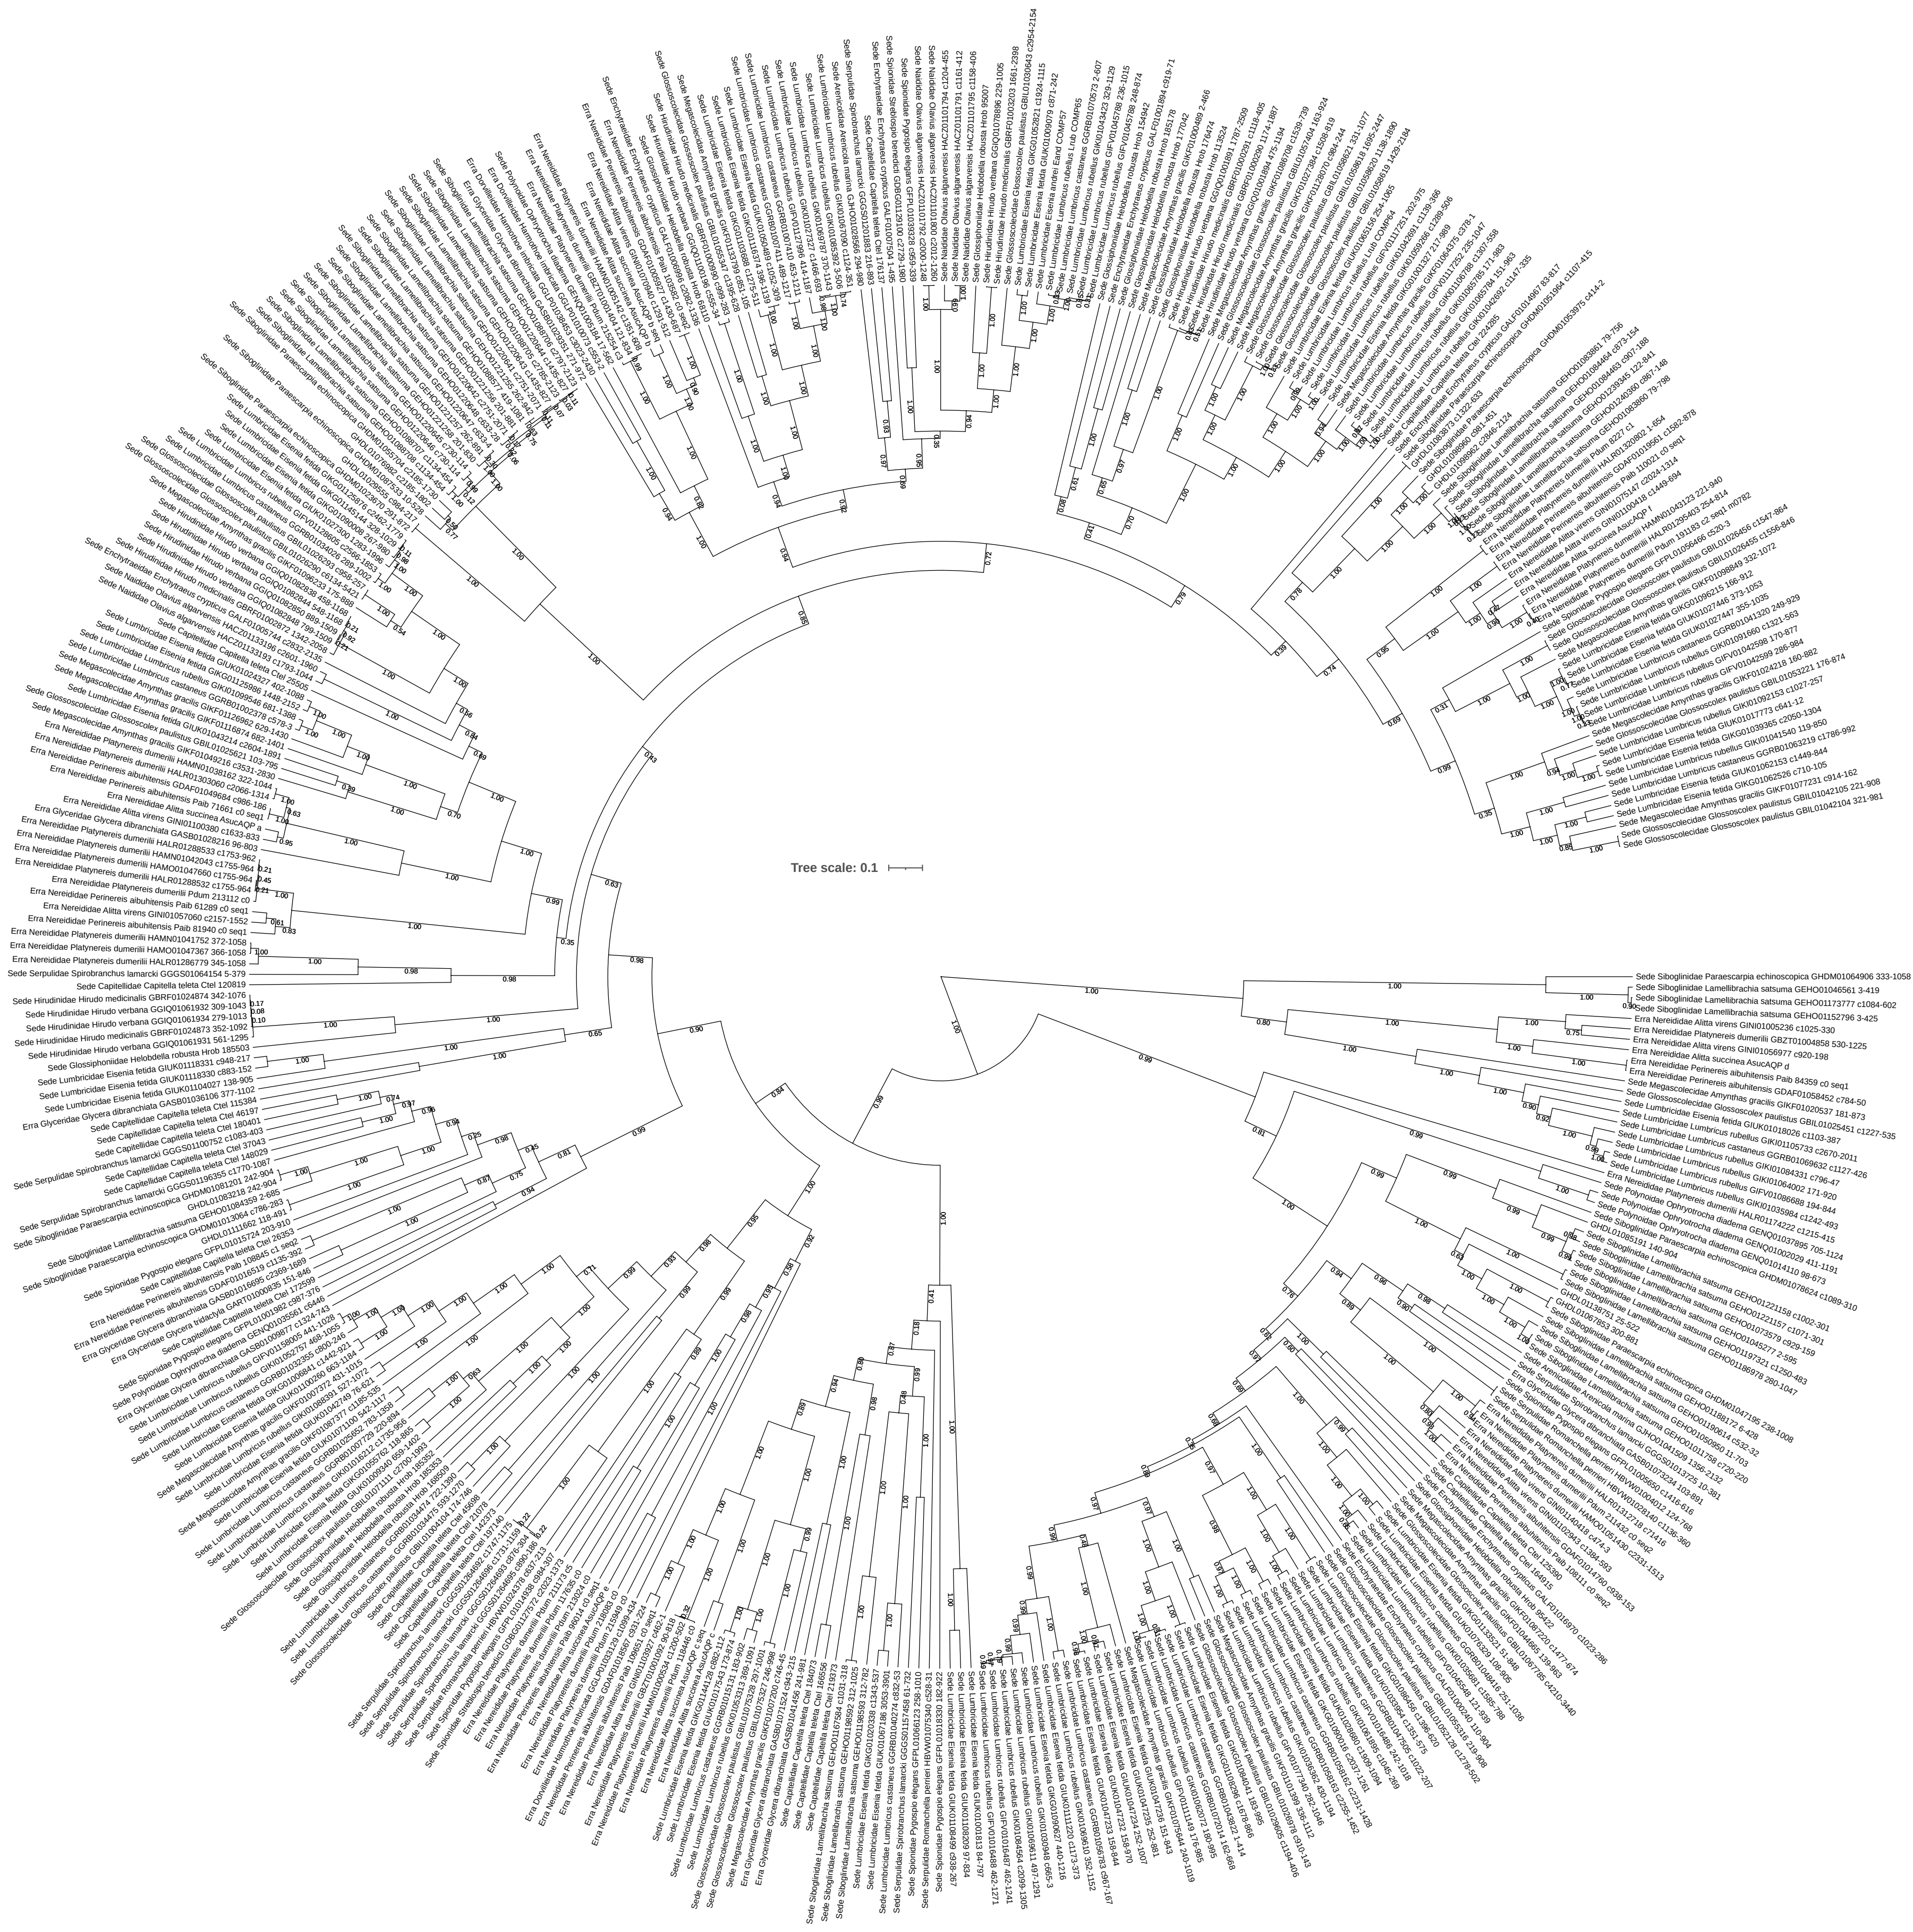

Supplement: s1 [file s1]
